# Supplementary material
Source: PubMed Central journal article supplement (PMC6407696)

## SUPPLEMENTAL MATERIAL

### Real World Treatment Trends in Endovascular Stroke Therapy

Hamidreza Saber, MD<sup>1</sup>, Babak B. Navi, MD<sup>2,3</sup>, James Grotta, MD<sup>4</sup>, Hooman Kamel, MD<sup>2,3</sup>, Arvind Bambhroliya, MBBS<sup>5</sup>, Farhaan S. Vahidy, MBBS<sup>5</sup>, Peng Roc Chen, MD<sup>6</sup>, Spiros Blackburn, MD<sup>6</sup>, Sean I. Savitz, MD<sup>5</sup>, Louise McCullough, MD<sup>5</sup>, Sunil A. Sheth, MD<sup>5</sup>

<sup>1</sup>Department of Neurology, Wayne State University School of Medicine, Detroit, MI;

<sup>2</sup>Department of Neurology, Weill Cornell Medical College, New York, NY;

<sup>3</sup>Feil Family Brain and Mind Research Institute, Weill Cornell Medical College, New York, NY;

<sup>4</sup>Clinical Innovation and Research Institute, Memorial Hermann Hospital, Houston, TX;

<sup>5</sup>Department of Neurology, UT Health McGovern School of Medicine, Houston, TX;

<sup>6</sup>Department of Neurosurgery, UT Health McGovern School of Medicine, Houston, TX.

#### Corresponding Author:

Sunil A. Sheth, MD

6431 Fannin St

MSB 7.005E

Houston, TX 77030

Tel: 713 500 7128

Email: [ssheth@post.harvard.edu](mailto:ssheth@post.harvard.edu)

**SUPPLEMENTAL TABLE.**

| <b>Supplemental Table I. Patient demographics in 2 cohorts.</b> |                           |                                    |
|-----------------------------------------------------------------|---------------------------|------------------------------------|
|                                                                 | <b>FL Cohort (n=3890)</b> | <b>Nationwide Cohort (n=42505)</b> |
| <b>Age (median, IQR)</b>                                        | 73 [61 - 82]              | 69 [58 - 79]                       |
| <b>Female Sex</b>                                               | 1997 (51%)                | 21252 (50%)                        |
| <b>Race</b>                                                     |                           |                                    |
| - <b>White</b>                                                  | 2311 (61%)                | 27955 (66%)                        |
| - <b>Black</b>                                                  | 612 (16%)                 | 5410 (13%)                         |
| - <b>Hispanic</b>                                               | 749 (20%)                 | 3220 (8%)                          |
| <b>IV tPA</b>                                                   | 1704 (44%)                | 15190 (36%)*                       |
| <b>Comorbidities</b>                                            |                           |                                    |
| - <b>Hypertension</b>                                           | 1815 (47%)                | 25790 (61%)                        |
| - <b>Smoking</b>                                                | 359 (9%)                  | 4650 (11%)                         |
| - <b>Dyslipidemia</b>                                           | 1017 (26%)                | 9950 (23%)                         |
| - <b>Renal Failure</b>                                          | 318 (8%)                  | 2225 (5%)                          |
| - <b>Diabetes</b>                                               | 1056 (27%)                | 9070 (21%)                         |
| - <b>Charlson Index</b>                                         | 3 [3-4]                   | 4 [3-5]                            |

\* count does not include "drip and ship" patients  
Data represented as median [IQR] or number (n, %). IQR: Interquartile range.

**SUPPLEMENTAL FIGURES.**

**Supplemental Figure I.** Percentage of annual total Endovascular Stroke Therapy (EST) procedures by annual hospital EST volume in Florida in 2016.

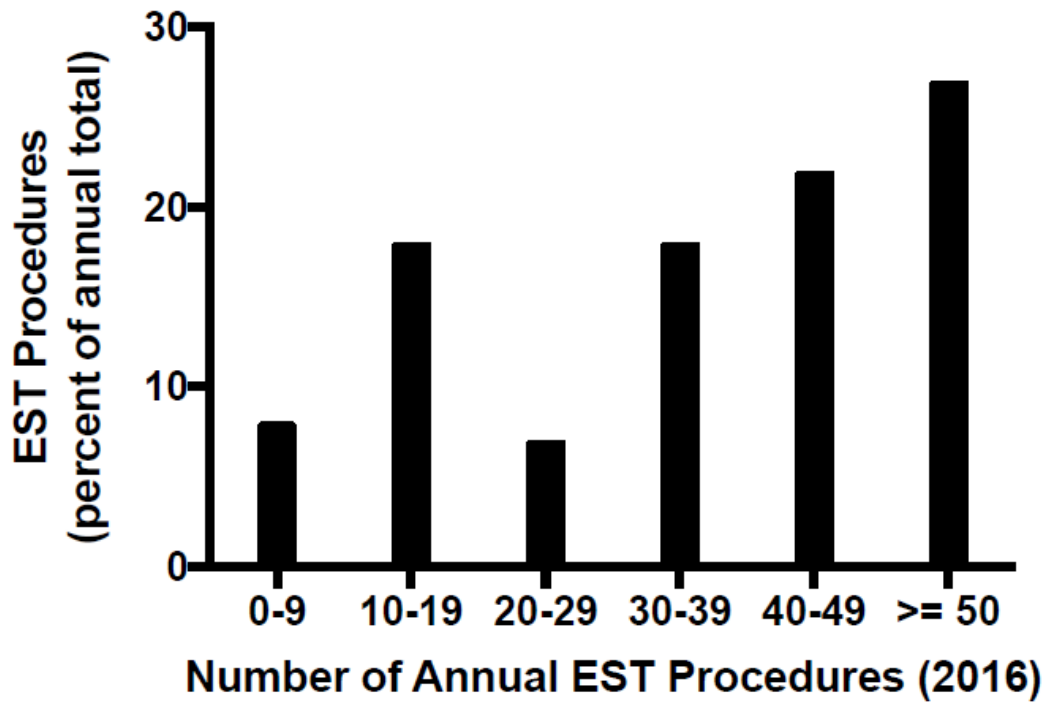

**Supplemental Figure II.** Likelihood of favorable discharge outcome for patients treated with Endovascular Stroke Therapy (EST) by volume of annual EST procedures per year in Florida (2006-2016). Solid red line represents the point estimate of the logistic regression and the shaded areas represent the 95% confidence interval.

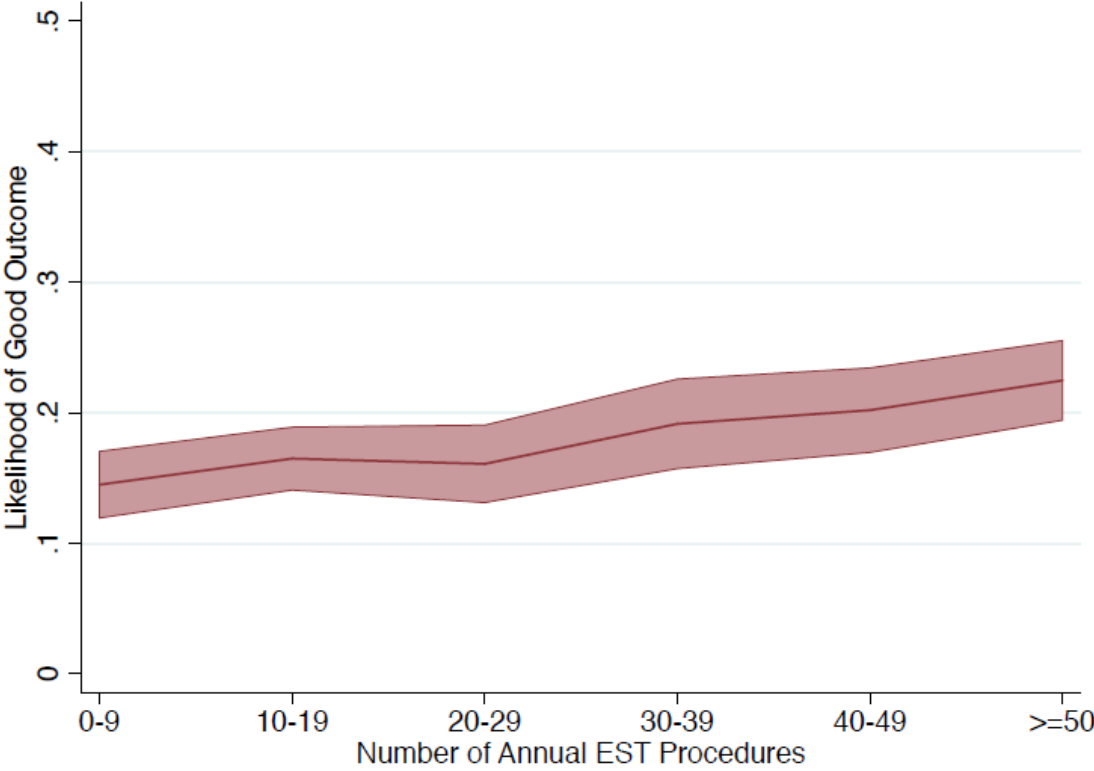

Supplement: NIHMS1518030-supplement-Supplemental_Material.pdf [file NIHMS1518030-supplement-Supplemental_Material.pdf]
